# Supplementary material for: Circular RNA circCCDC9 acts as a miR-6792-3p sponge to suppress the progression of gastric cancer through regulating CAV1 expression
Source: Springer Nature journal article supplement (doi:10.1186/s12943-020-01203-8), 2020-05-09
Supplement: MOESM1 [file 17967414]

**Table S1** Primers used in this study

| Name         | Primer           | Sequence (5'-3')                                       |
|--------------|------------------|--------------------------------------------------------|
| circCCDC9    | Forward primer   | CTGTGGCCTTGAGCACGAG                                    |
|              | Reverse primer   | CATACTCGGCGATCTTCTCCA                                  |
| linear CCDC9 | Forward primer   | GAAGACCGATGGGATGTTCAAG                                 |
|              | Reverse primer   | GACAGGAACTCCCCAAAAGTAG                                 |
| GAPDH        | Forward primer   | GGGAAGGTGAAGGTCGGAGT                                   |
|              | Reverse primer   | GGGGTCATTGATGGCAACA                                    |
| miR-6792-3p  | Stem-loop Primer | GTCGTATCCAGTGCAGGGTCCGAGG<br>TATTCGCACTGGATACGACATGAGC |
|              | Forward primer   | CGCTCCTCCACAGCCCCT                                     |
|              | Reverse primer   | AGTGCAGGGTCCGAGGTATT                                   |
|              | Reverse primer   | AGTGCAGGGTCCGAGGTATT                                   |
| miR-6743-3p  | Stem-loop Primer | GTCGTATCCAGTGCAGGGTCCGAGG<br>TATTCGCACTGGATACGACTGTGGG |
|              | Forward primer   | CGAGCCGCTCTTCTCCCTG                                    |
|              | Reverse primer   | ATCCAGTGCAGGGTCCGAGG                                   |
|              | Reverse primer   | ATCCAGTGCAGGGTCCGAGG                                   |
| miR-4691-5p  | Stem-loop Primer | GTCGTATCCAGTGCAGGGTCCGAGG<br>TATTCGCACTGGATACGACCCGCAG |
|              | Forward primer   | CGGTCCCTCCAGGCCATGAG                                   |
|              | Reverse primer   | ATCCAGTGCAGGGTCCGAGG                                   |
|              | Reverse primer   | ATCCAGTGCAGGGTCCGAGG                                   |
| miR-4717-5p  | Stem-loop Primer | GTCGTATCCAGTGCAGGGTCCGAGG<br>TATTCGCACTGGATACGACACACAT |
|              | Forward primer   | CGTAGGCCACAGCCACCC                                     |
|              | Reverse primer   | AGTGCAGGGTCCGAGGTATT                                   |
|              | Reverse primer   | AGTGCAGGGTCCGAGGTATT                                   |
| miR-4285     | Stem-loop Primer | GTCGTATCCAGTGCAGGGTCCGAGG<br>TATTCGCACTGGATACGACATGAGT |
|              | Forward primer   | CGGCGGCGAGTCCG                                         |
|              | Reverse primer   | ATCCAGTGCAGGGTCCGAGG                                   |
|              | Reverse primer   | ATCCAGTGCAGGGTCCGAGG                                   |
| U6           | Stem-loop Primer | CTCAACTGGTGTCGTGGAGTCG<br>GCAATTCAGTTGAGAAAAATAT       |
|              | Forward primer   | CAAGGATGACACGCAA                                       |
|              | Reverse primer   | TCAACTGGTGTCGTGG                                       |
|              | Reverse primer   | TCAACTGGTGTCGTGG                                       |
| CAV1         | Forward primer   | AATACTGGTTTTACCGCTTGCT                                 |
|              | Reverse primer   | CATGGTACAACCTGCCAGATG                                  |

**Table S2 Oligonucleotides and probes used in this study**

| Definition                      | Sequence (5'-3')                                                   |
|---------------------------------|--------------------------------------------------------------------|
| si-circCCDC9-1                  | Sense: ACGAGCGGCAGGAGUGGGATT<br>Antisense: UCCCACUCCUGCCGCUCGUGC   |
| si-circCCDC9-2                  | Sense: AGCGGCAGGAGUGGGAGGATT<br>Antisense: UCCUCCCACUCCUGCCGCUCG   |
| si-circCCDC9-3                  | Sense: GCGGCAGGAGUGGGAGGAGTT<br>Antisense: CUCCUCCCACUCCUGCCGCUC   |
| si-circCCDC9 NC                 | Sense: UUCUCCGAACGUGUCACGUTT<br>Antisense: ACGUGACACGUUCGGAGAATT   |
| miR-6792-3p mimics              | Sense: CUCCUCCACAGCCCCUGCUCAU<br>Antisense: GAGCAGGGGCUGUGGAGGAGUU |
| miR-6792-3p mimics NC           | Sense: UUCUCCGAACGUGUCACGUTT<br>Antisense: ACGUGACACGUUCGGAGAATT   |
| miR-6792-3p inhibitor           | AUGAGCAGGGGCUGUGGAGGAG                                             |
| miR-6792-3p inhibitor NC        | CAGUACUUUUGUGUAGUACAA                                              |
| Biotin-circCCDC9 probe          | TCCTCCCACTCCTGCCGCTCG                                              |
| Biotin-miR-6792-3p              | ATGAGCAGGGGCTGTGGAGGAG                                             |
| Oligo probe                     | GTGTAACACGTCTATACGCCCA                                             |
| Cy3-labeled circCCDC9 probe     | CCGCTCCTCCCACTCCTGCCGCTCGT                                         |
| FAM-labeled miR-6792-3p probe   | ATGAGCAGGGGCTGTGGAGGAG                                             |
| Digoxin-labeled circCCDC9 probe | CCGCTCCTCCCACTCCTGCCGCTCGT                                         |
