# Supplementary material for: Circular RNA circCCDC9 acts as a miR-6792-3p sponge to suppress the progression of gastric cancer through regulating CAV1 expression
Source: Springer Nature journal article supplement (doi:10.1186/s12943-020-01203-8), 2020-05-09
Supplement: MOESM3 [file 17967414]

**Table S3** Correlation between circCCDC9 expression and clinicopathological features in 54 GC tissues from TMA.

| Characteristics       | Case | CircCCDC9 expression |      | <i>p</i> value |
|-----------------------|------|----------------------|------|----------------|
|                       |      | low                  | high |                |
| Tumor cases           | 54   | 40                   | 14   |                |
| Age at surgery(years) |      |                      |      | 1.000          |
| <60                   | 15   | 11                   | 4    |                |
| ≥60                   | 39   | 29                   | 10   |                |
| Gender                |      |                      |      | 0.208          |
| Male                  | 38   | 30                   | 8    |                |
| Female                | 16   | 10                   | 6    |                |
| GTD (cm)              |      |                      |      | <b>0.043</b>   |
| ≥5                    | 28   | 24                   | 4    |                |
| <5                    | 26   | 16                   | 10   |                |
| T stage               |      |                      |      | 0.595          |
| T2                    | 5    | 3                    | 2    |                |
| T3+T4                 | 49   | 37                   | 12   |                |
| Lymph node invasion   |      |                      |      | <b>0.000</b>   |
| Negative(N0)          | 11   | 1                    | 10   |                |
| Positive(N1-N3)       | 43   | 39                   | 4    |                |
| Tumor site            |      |                      |      | 1.000          |
| Cardiac               | 13   | 10                   | 3    |                |
| Non-cardiac           | 41   | 30                   | 11   |                |
| TNM stage             |      |                      |      | <b>0.000</b>   |
| II                    | 17   | 5                    | 12   |                |
| III                   | 37   | 35                   | 2    |                |
| Histological grade    |      |                      |      | 0.657          |
| Low                   | 32   | 23                   | 9    |                |
| Middle-High           | 22   | 17                   | 5    |                |

GTD: Greatest tumor diameter.
