# Supplementary material for: Circular RNA circCCDC9 acts as a miR-6792-3p sponge to suppress the progression of gastric cancer through regulating CAV1 expression
Source: Springer Nature journal article supplement (doi:10.1186/s12943-020-01203-8), 2020-05-09
Supplement: MOESM5 [file 17967414]

**Table S4** Correlation between miR-6792-3p expression and clinicopathological features in 54 GC tissues from TMA.

| Characteristics       | Case | miR-6792-3p expression |      | <i>p</i> value |
|-----------------------|------|------------------------|------|----------------|
|                       |      | low                    | high |                |
| Tumor cases           | 54   | 16                     | 38   |                |
| Age at surgery(years) |      |                        |      | 0.333          |
| <60                   | 15   | 6                      | 9    |                |
| ≥60                   | 39   | 10                     | 29   |                |
| Gender                |      |                        |      | 0.411          |
| Male                  | 38   | 10                     | 28   |                |
| Female                | 16   | 6                      | 10   |                |
| GTD (cm)              |      |                        |      | <b>0.010</b>   |
| ≥5                    | 28   | 4                      | 24   |                |
| <5                    | 26   | 12                     | 14   |                |
| T stage               |      |                        |      | 0.627          |
| T2                    | 5    | 2                      | 3    |                |
| T3+T4                 | 49   | 14                     | 35   |                |
| Lymph node invasion   |      |                        |      | <b>0.000</b>   |
| Negative(N0)          | 11   | 11                     | 0    |                |
| Positive(N1-N3)       | 43   | 5                      | 38   |                |
| Tumor site            |      |                        |      | 0.170          |
| Cardiac               | 13   | 6                      | 7    |                |
| Non-cardiac           | 41   | 10                     | 31   |                |
| TNM stage             |      |                        |      | <b>0.000</b>   |
| II                    | 17   | 14                     | 3    |                |
| III                   | 37   | 2                      | 35   |                |
| Histological grade    |      |                        |      | 0.770          |
| Low                   | 32   | 9                      | 23   |                |
| Middle-High           | 22   | 7                      | 15   |                |

GTD: Greatest tumor diameter.
